# Supplementary material for: Syntheses, crystal structures and luminescent properties of Zn(ii)/Cd(ii) supramolecular complexes incorporating 4-sulfinobenzoate and its in situ oxidized ligand
Source: Royal Society of Chemistry journal article supplement (doi:10.1039/c2ce06584c), 2012-01-01
Supplement: c2ce06584c.pdf [file c2ce06584c.pdf]

Electronic Supplementary Information for CrystEngComm

This journal is (c) The Royal Society of Chemistry 2012

Electronic Supplementary Information (ESI)

**Syntheses, crystal structures and luminescent properties of  
Zn(II)/Cd(II) supramolecular complexes incorporating  
4-sulfinobenzoate and its in situ oxidized ligand**

**Huang Wang, Li-Hua Huo, Zhao-Peng Deng,<sup>\*</sup> Hui Zhao and Shan Gao<sup>\*</sup>**

Electronic Supplementary Information for CrystEngComm

This journal is (c) The Royal Society of Chemistry 2012

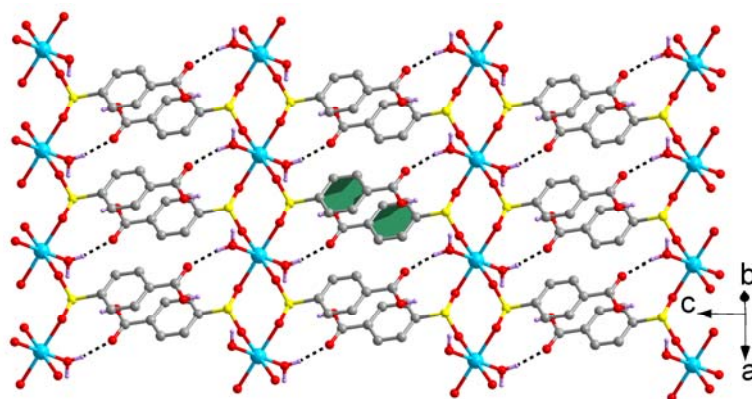

**Fig. S1** 2-D layer structure extended by hydrogen bonds with the  $\pi \cdots \pi$  stacking interactions denoted as sea green planes.

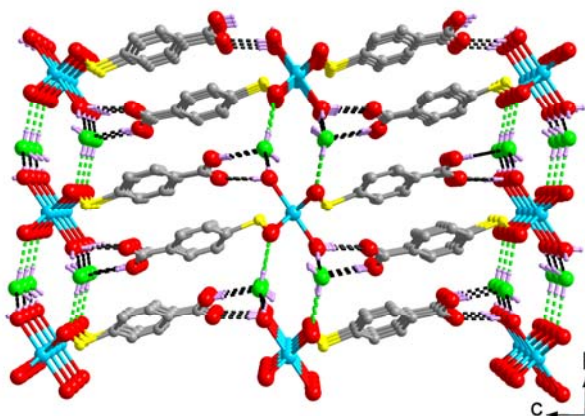

**Fig. S2** 3-D supramolecular network of complex **1** extended by hydrogen bonds (green dashed lines) with the lattice water molecules denoted as green balls.

Electronic Supplementary Information for CrystEngComm

This journal is (c) The Royal Society of Chemistry 2012

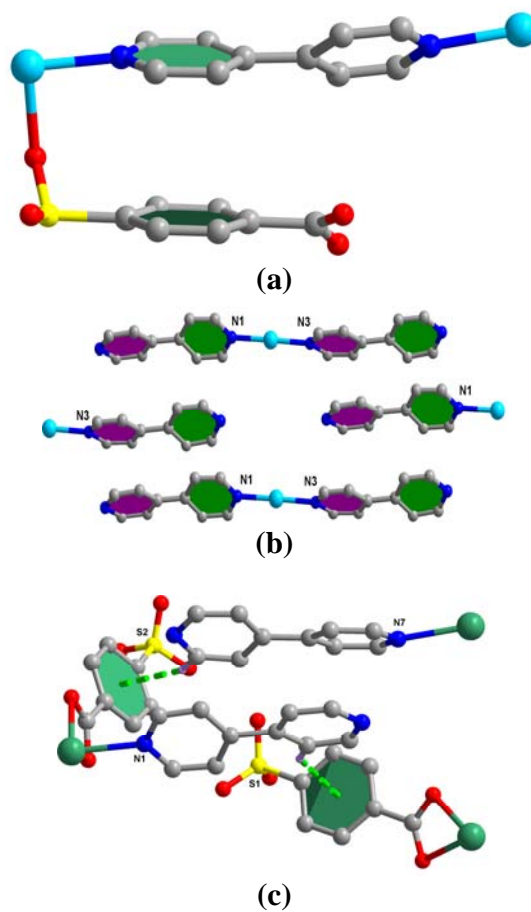

**Fig. S3** C-H... $\pi$  and  $\pi$ - $\pi$  stacking interactions in complexes **4** (a), **5** (b) and **6** (c). The dihedral angles between the pyridyl rings were reported in the main text.

Electronic Supplementary Information for CrystEngComm

This journal is (c) The Royal Society of Chemistry 2012

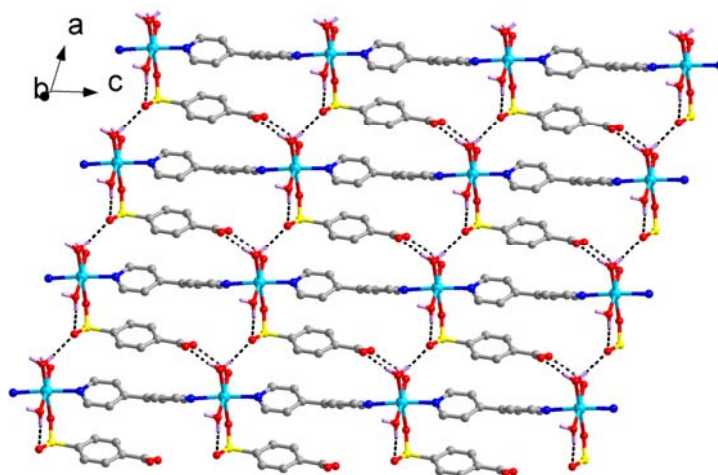

**Fig. S4** 2-D layer structure stabilized by hydrogen bonds.

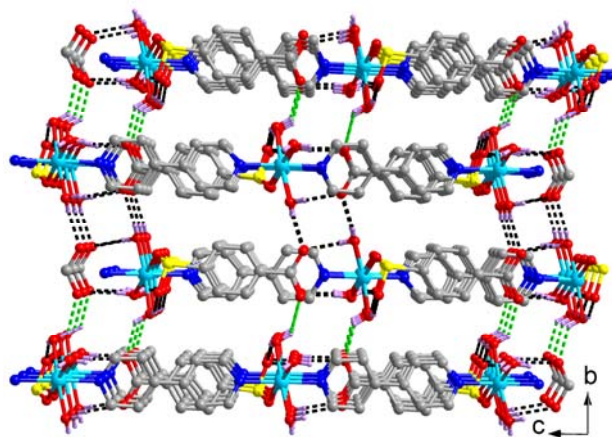

**Fig. S5** 3-D supramolecular network extended by hydrogen bonds (green dashed lines) between coordinated water molecules and carboxyl groups.

Electronic Supplementary Information for CrystEngComm

This journal is (c) The Royal Society of Chemistry 2012

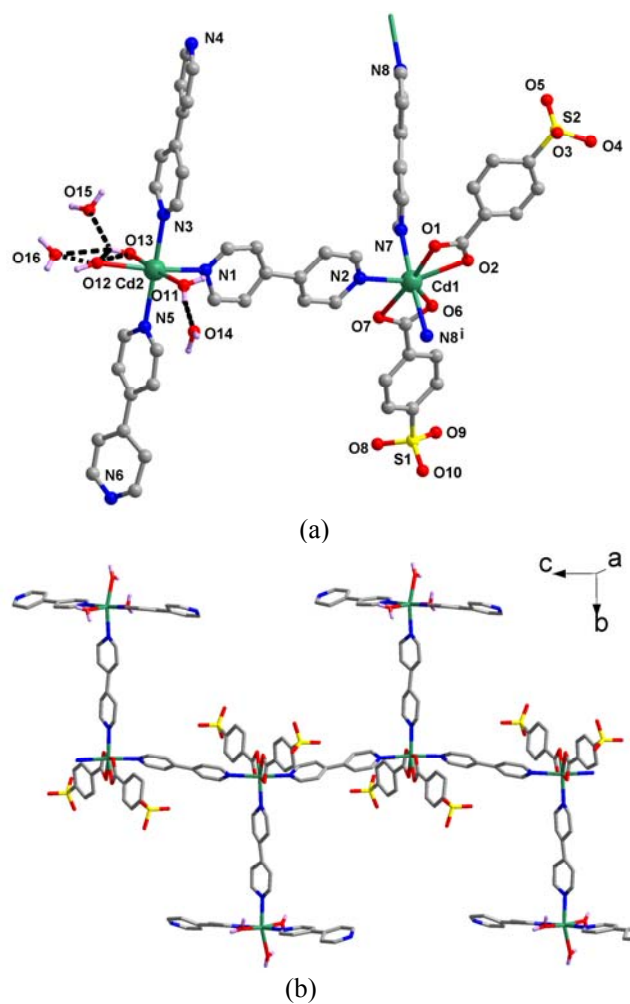

**Fig. S6** Molecular structure (a) and 1-D linear chain structure (b) of the reported  $\{[\text{Cd}_2(\text{SB})_2(4,4'\text{-bipy})_4(\text{H}_2\text{O})_3]_n \cdot 3n\text{H}_2\text{O}\}$ .

Electronic Supplementary Information for CrystEngComm

This journal is (c) The Royal Society of Chemistry 2012

**PXRD Analysis.** Powder X-ray diffraction (PXRD) patterns for solid samples of complexes **1-6** are measured at room temperature as illustrated in Fig. S7. The patterns are highly similar to their simulated ones (based on the single-crystal X-ray diffraction data), indicating that the single-crystal structures are really representative of the bulk of the corresponding samples.

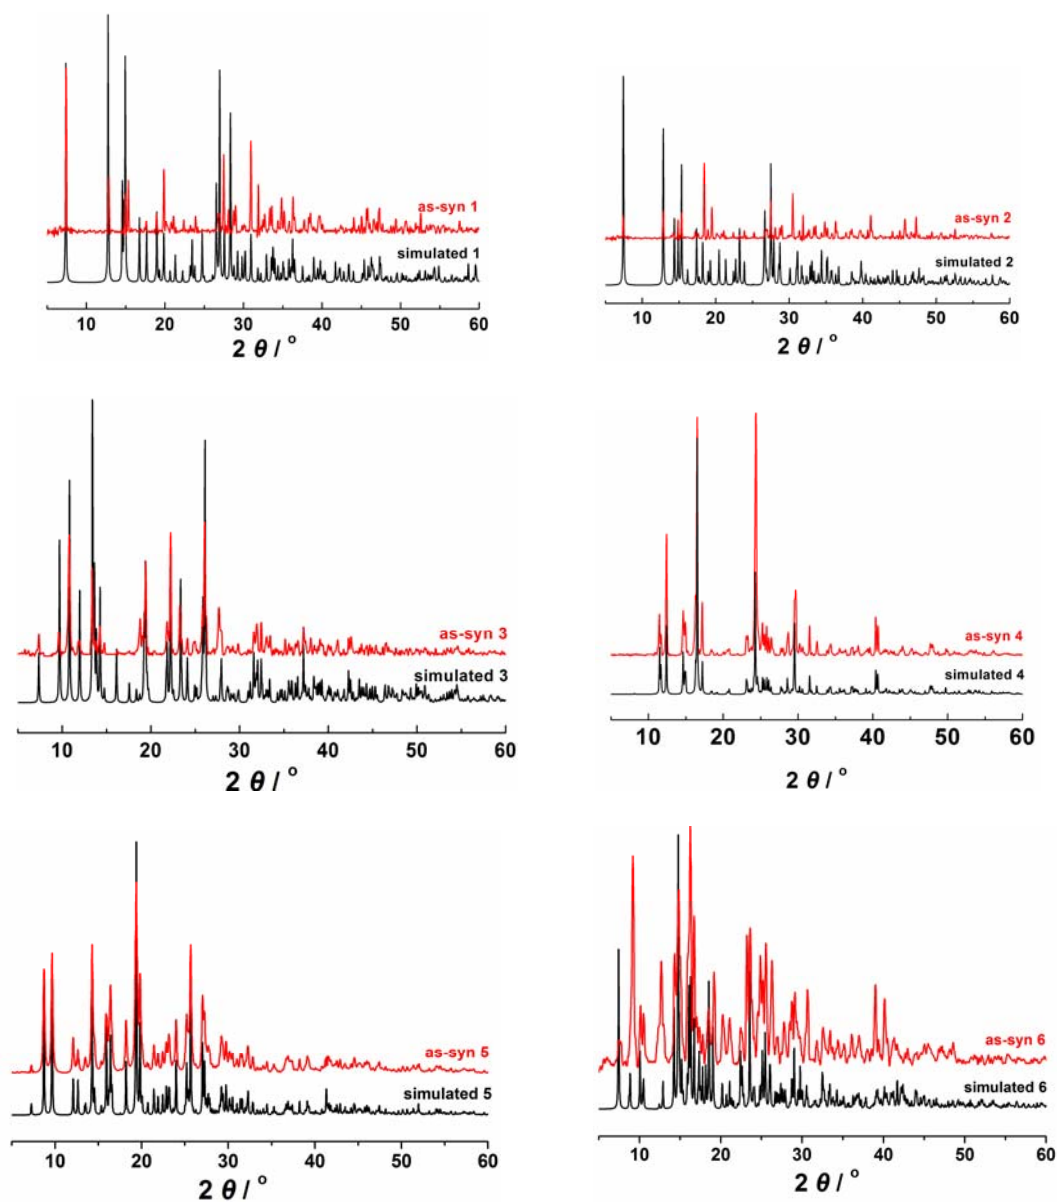

Fig. S7 PXRD patterns for complexes 1-6.

Electronic Supplementary Information for CrystEngComm

This journal is (c) The Royal Society of Chemistry 2012

### Thermogravimetric analysis

To examine the thermal stability of the complexes, in this study, their stabilities were analyzed on crystalline samples by thermogravimetric analyses (TGA) from room temperature to 900 °C at a rate of 10 °C min<sup>-1</sup>, under N<sub>2</sub> atmosphere. As shown in Fig. S8, the TGA curve indicates that complex **1** loses the lattice and coordinated water molecules from 40 to 160 °C with the observed weight loss of 13.98% (calcd 14.19%). The following gradually weigh losses correspond to the loss of the organic components occurs in the temperature range 160-580 °C. The remaining component is ZnO (obsd 16.25%, calcd 16.03%). Complex **2** exhibits the similar loss steps as complex **1** with the loss of the lattice and coordinated water molecules occurring between 40 and 156 °C (obsd 12.75%, calcd 12.99%). The following weight loss completes at 610 °C, corresponding to CdO (obsd 23.41%, calcd 23.15%). Complex **3** loses the coordinated water molecules from 50 to 120 °C with the observed weight loss of 7.58% (calcd 7.37%). Then, the following weight loss with the decomposing of organic components occurs in the temperature range 260-580 °C, and the final remaining component is CdO (obsd 25.98%, calcd 26.27%). The weight loss of the coordinated water molecules in complex **4** occurs between 55 and 115 °C (obsd 11.53%, calcd 11.76%). The following weight loss with the decomposing of organic components occurs in the temperature range 230-485 °C. The remaining component is ZnO (obsd 14.42%, calcd 14.80%). Complex **5** loses the lattice and coordinated water molecules from 35 to 120 °C with the observed weight loss of 19.71% (calcd 19.96%). Then, the following weight loss with the decomposing of organic components occurs in the temperature range 310-675 °C, and the final remaining component is ZnO (obsd 11.52%, calcd 11.27%). Complex **6** loses the lattice and coordinated water molecules from 35 to 130 °C with the observed weight loss of 8.05% (calcd 7.96%). Then, the following weight loss with the decomposing of organic components occurs in the temperature range 130-670 °C, and the final remaining component is CdO (obsd 19.03%, calcd 18.91%).

Electronic Supplementary Information for CrystEngComm  
This journal is (c) The Royal Society of Chemistry 2012

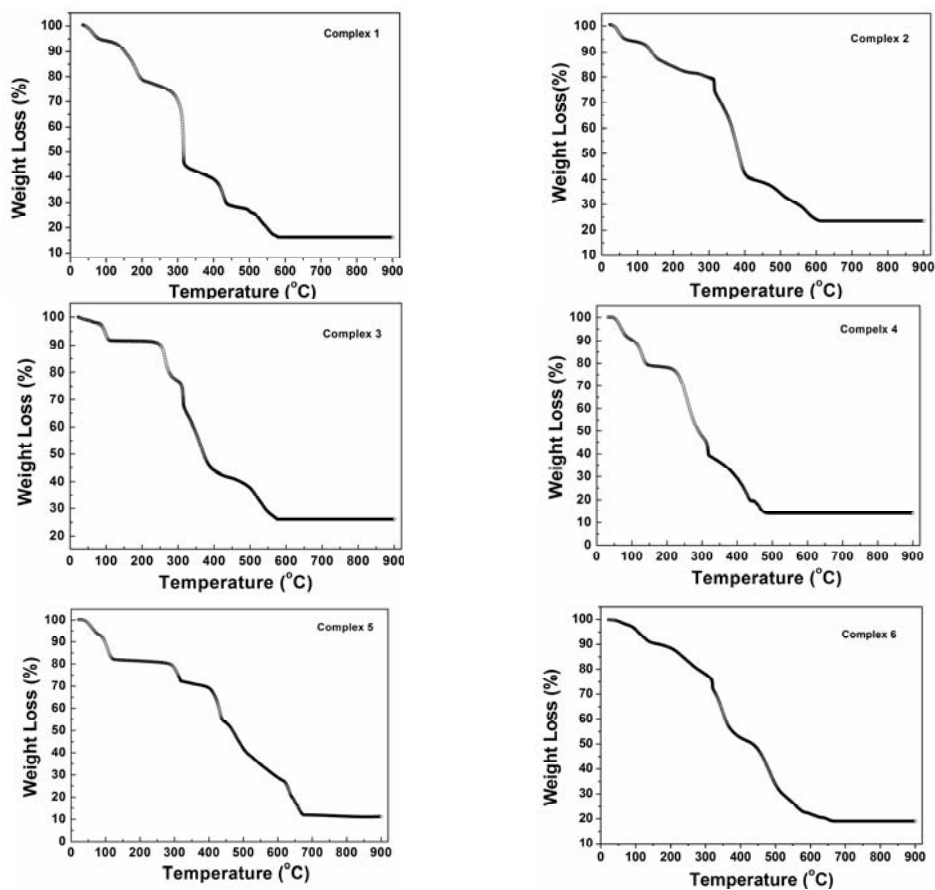

**Fig. S8** TG curves of complexes 1-6.



Electronic Supplementary Information for CrystEngComm

This journal is (c) The Royal Society of Chemistry 2012

**Table S1** Selected bond lengths (Å) data of complexes **1-6<sup>a</sup>**

| <b>Complex 1</b>         |            |                           |          |
|--------------------------|------------|---------------------------|----------|
| Zn(1)-O(4) <sup>i</sup>  | 2.0740(19) | Zn(1)-O(1W) <sup>i</sup>  | 2.116(2) |
| Zn(1)-O(4)               | 2.0740(19) | Zn(1)-O(3) <sup>ii</sup>  | 2.152(2) |
| Zn(1)-O(1W)              | 2.116(2)   | Zn(1)-O(3) <sup>iii</sup> | 2.152(2) |
| <b>Complex 2</b>         |            |                           |          |
| Cd(1)-O(3) <sup>i</sup>  | 2.261(4)   | Cd(1)-O(1W)               | 2.282(5) |
| Cd(1)-O(3)               | 2.261(4)   | Cd(1)-O(4) <sup>ii</sup>  | 2.318(4) |
| Cd(1)-O(1W) <sup>i</sup> | 2.282(5)   | Cd(1)-O(4) <sup>iii</sup> | 2.318(4) |
| <b>Complex 3</b>         |            |                           |          |
| Cd(1)-O(2W)              | 2.318(3)   | Cd(1)-O(1) <sup>i</sup>   | 2.390(3) |
| Cd(1)-O(3)               | 2.341(2)   | Cd(1)-N(2)                | 2.414(3) |
| Cd(1)-N(1)               | 2.365(3)   | Cd(1)-O(1W)               | 2.432(3) |
| Cd(1)-O(2) <sup>i</sup>  | 2.476(3)   |                           |          |
| <b>Complex 4</b>         |            |                           |          |
| Zn(1)-O(2W)              | 2.112(6)   | Zn(1)-O(3W)               | 2.155(6) |
| Zn(1)-O(1)               | 2.129(6)   | Zn(1)-N(1)                | 2.160(6) |
| Zn(1)-N(2) <sup>i</sup>  | 2.143(5)   | Zn(1)-O(1W)               | 2.167(6) |
| <b>Complex 5</b>         |            |                           |          |
| Zn(1)-O(2W)              | 2.109(5)   | Zn(1)-N(1)                | 2.140(5) |
| Zn(1)-O(3W)              | 2.115(5)   | Zn(1)-N(3)                | 2.147(5) |

|             |          |             |          |
|-------------|----------|-------------|----------|
| Zn(1)-O(1W) | 2.119(5) | Zn(1)-O(4W) | 2.159(5) |
|-------------|----------|-------------|----------|

**Complex 6**

|            |          |                         |          |
|------------|----------|-------------------------|----------|
| Cd(1)-O(6) | 2.310(4) | Cd(2)-O(1W)             | 2.300(4) |
| Cd(1)-O(7) | 2.655(4) | Cd(2)-O(2W)             | 2.314(4) |
| Cd(1)-N(1) | 2.339(4) | Cd(2)-O(3W)             | 2.336(3) |
| Cd(1)-N(5) | 2.339(4) | Cd(2)-N(7)              | 2.344(4) |
| Cd(1)-N(3) | 2.358(4) | Cd(2)-N(4)              | 2.350(4) |
| Cd(1)-O(1) | 2.422(3) | Cd(2)-N(6) <sup>i</sup> | 2.359(4) |
| Cd(1)-O(2) | 2.475(3) |                         |          |

<sup>a</sup> Symmetry operation: **For 1**, i -x,-y+2,-z+1; ii x-1,y,z; iii -x+1,-y+2,-z+1. **For 2**, i-x,-y+1,-z; ii -x+1,-y+1,-z; iii x-1,y,z. **For 3**, i -x+1,-y,-z. **For 4**, i x,y,z-1. **For 6**, x-1/2,-y+1/2,z+1/2.

---

Electronic Supplementary Information for CrystEngComm

This journal is (c) The Royal Society of Chemistry 2012

**Table S2** Hydrogen bond parameters for complexes **1-6<sup>a</sup>**

| D-H...A                             | d(D...H)/Å | d(H...A)/Å | d(D...A)/Å | <(DHA)/° |
|-------------------------------------|------------|------------|------------|----------|
| <b>Complex 1</b>                    |            |            |            |          |
| O(1W)-H(1W1)...O(1) <sup>v</sup>    | 0.85       | 1.87       | 2.720(3)   | 175.7    |
| O(1W)-H(1W2)...O(2W) <sup>vi</sup>  | 0.85       | 2.04       | 2.887(3)   | 175.7    |
| O(2)-H(2B)...O(2W)                  | 0.82       | 1.87       | 2.685(3)   | 173.1    |
| O(2W)-H(2W1)...O(3) <sup>vii</sup>  | 0.85       | 1.93       | 2.783(3)   | 177.9    |
| <b>Complex 2</b>                    |            |            |            |          |
| O(1W)-H(1W1)...O(2W) <sup>v</sup>   | 0.85(2)    | 2.04(2)    | 2.877(7)   | 169(8)   |
| O(1W)-H(1W2)...O(1) <sup>vi</sup>   | 0.85(2)    | 1.89(2)    | 2.721(6)   | 165(8)   |
| O(2W)-H(2W1)...O(4) <sup>vii</sup>  | 0.85(2)    | 1.97(2)    | 2.811(6)   | 177(8)   |
| O(2W)-H(2W2)...O(4) <sup>viii</sup> | 0.85(2)    | 2.45(2)    | 3.283(6)   | 170(7)   |
| O(2)-H(2A)...O(2W)                  | 0.82       | 1.87       | 2.678(6)   | 169.5    |
| <b>Complex 3</b>                    |            |            |            |          |
| O(1W)-H(1W1)...O(4) <sup>ii</sup>   | 0.85(3)    | 1.93(3)    | 2.775(3)   | 176(4)   |
| O(1W)-H(1W2)...O(2) <sup>iii</sup>  | 0.85(3)    | 2.14(3)    | 2.960(4)   | 163(4)   |
| O(2W)-H(2W1)...O(2) <sup>iii</sup>  | 0.85(3)    | 2.15(2)    | 2.882(4)   | 145(3)   |
| O(2W)-H(2W1)...O(4) <sup>iv</sup>   | 0.85(3)    | 2.52(3)    | 2.934(3)   | 111(3)   |
| O(2W)-H(2W2)...O(4)                 | 0.85(3)    | 1.98(3)    | 2.777(3)   | 158(3)   |
| <b>Complex 4</b>                    |            |            |            |          |

---

|                                     |         |           |           |         |
|-------------------------------------|---------|-----------|-----------|---------|
| O(1W)-H(1W1)...O(2)                 | 0.82    | 2.00      | 2.766(9)  | 156.1   |
| O(1W)-H(1W2)...O(4) <sup>iii</sup>  | 0.82    | 2.13      | 2.727(10) | 129.4   |
| O(2W)-H(2W1)...O(4) <sup>iv</sup>   | 0.82    | 1.85      | 2.655(9)  | 167.8   |
| O(2W)-H(2W2)...O(2) <sup>v</sup>    | 0.82    | 2.04      | 2.812(9)  | 157.4   |
| O(3W)-H(3W1)...O(3) <sup>vi</sup>   | 0.82    | 2.00      | 2.761(9)  | 154.4   |
| O(3W)-H(3W2)...O(3) <sup>iv</sup>   | 0.82    | 2.05      | 2.860(9)  | 168.0   |
| <b>Complex 5</b>                    |         |           |           |         |
| O(1W)-H(1W1)...O(5W)                | 0.85(8) | 2.04(5)   | 2.804(8)  | 149(10) |
| O(1W)-H(1W2)...N(2) <sup>i</sup>    | 0.85(8) | 1.96(4)   | 2.766(8)  | 157(10) |
| O(2W)-H(2W1)...O(5)                 | 0.85(8) | 1.87(3)   | 2.689(8)  | 162(9)  |
| O(2W)-H(2W2)...O(5W) <sup>ii</sup>  | 0.85(8) | 1.94(2)   | 2.777(8)  | 166(8)  |
| O(3W)-H(3W1)...O(3) <sup>iii</sup>  | 0.85(8) | 2.02(5)   | 2.790(7)  | 151(8)  |
| O(3W)-H(3W2)...N(4) <sup>iv</sup>   | 0.85(8) | 2.07(5)   | 2.812(8)  | 147(8)  |
| O(4W)-H(4W1)...O(3) <sup>v</sup>    | 0.85(8) | 2.38(8)   | 2.970(8)  | 127(8)  |
| O(4W)-H(4W2)...O(6W)                | 0.85(8) | 1.86(3)   | 2.688(9)  | 167(11) |
| O(5W)-H(5W1)...O(4)                 | 0.85(8) | 1.920(15) | 2.769(9)  | 176(10) |
| O(5W)-H(5W2)...O(8W) <sup>vi</sup>  | 0.85(8) | 1.939(15) | 2.792(10) | 177(11) |
| O(6W)-H(6W1)...O(1) <sup>iii</sup>  | 0.85    | 1.99      | 2.841(10) | 176.1   |
| O(6W)-H(6W2)...O(7W) <sup>vii</sup> | 0.85    | 1.72      | 2.570(13) | 175.6   |
| O(7W)-H(7W1)...O(8W) <sup>vi</sup>  | 0.85    | 2.15      | 3.000(14) | 176.7   |
| O(7W)-H(7W2)...O(5)                 | 0.85    | 1.73      | 2.579(11) | 177.5   |
| O(8W)-H(8W1)...O(2)                 | 0.85(8) | 1.90(2)   | 2.742(12) | 172(13) |

---

|                                      |         |         |           |         |
|--------------------------------------|---------|---------|-----------|---------|
| O(8W)-H(8W2)...O(6W) <sup>viii</sup> | 0.85(8) | 2.13(8) | 2.877(11) | 146(12) |
| <b>Complex 6</b>                     |         |         |           |         |
| O(1W)-H(1W1)...N(8) <sup>iii</sup>   | 0.85    | 2.29    | 2.791(6)  | 118.3   |
| O(1W)-H(1W2)...O(5W) <sup>iv</sup>   | 0.86    | 2.40    | 3.261(7)  | 179.2   |
| O(2W)-H(2W1)...O(7) <sup>v</sup>     | 0.85    | 2.37    | 2.932(6)  | 124.4   |
| O(2W)-H(2W2)...O(1W)                 | 0.85    | 2.54    | 3.389(6)  | 179.6   |
| O(3W)-H(3W1)...O(1W)                 | 0.85    | 2.47    | 3.307(5)  | 168.8   |
| O(3W)-H(3W2)...N(6) <sup>i</sup>     | 0.85    | 2.34    | 3.180(5)  | 169.0   |
| O(4W)-H(4W1)...O(5) <sup>vi</sup>    | 0.85    | 2.26    | 2.880(9)  | 129.2   |
| O(4W)-H(4W2)...O(10)                 | 0.87    | 1.88    | 2.685(8)  | 153.7   |
| O(5W)-H(5W1)...O(1) <sup>vii</sup>   | 0.87    | 1.99    | 2.858(6)  | 178.7   |
| O(5W)-H(5W2)...N(2)                  | 0.85    | 1.93    | 2.754(6)  | 164.9   |
| O(6W)-H(6W1)...O(4)                  | 0.85    | 1.92    | 2.770(8)  | 174.4   |
| O(6W)-H(6W2)...O(8) <sup>vii</sup>   | 0.85    | 2.15    | 2.998(9)  | 174.8   |
| O(1W)-H(1W1)...N(8) <sup>iii</sup>   | 0.85    | 2.29    | 2.791(6)  | 118.3   |

<sup>a</sup> Symmetry operation: **For 1**, v -x+1,-y+2,-z+2; vi -x,-y+2,-z+2; vii -x+1,-y+1,-z+2. **For 2**, v x,y,z-1; vi x-1,y,z-1; vii -x+1,-y,-z+1; viii x,y,z+1. **For 3**, ii x+1,y,z; iii x,y+1,z; iv -x,-y+1,-z. **For 4**, iii -x+1,-y+1,-z+1; iv x+1,y,z-1; v x+1,y,z; vi -x+1,-y,-z+1. **For 5**, i x,y,z+1; ii x+1,y,z; iii -x+2,y-1/2,-z+1; iv x,y,z-1; v -x+1,y-1/2,-z+1; vi x-1,y,z-1; vii -x+1,y-1/2,-z; viii -x+1,y+1/2,-z+1. **For 6**, i, x-1/2,-y+1/2,z+1/2; iii, x,-y+1,z-1/2; iv, x+1/2,y+1/2,z+1; v, x,-y,z+1/2; vi, x+1/2,-y+1/2,z+1/2; vii, x,-y,z-1/2.
